# Supplementary material
Source: ML conference proceedings conference paper supplement (https://openreview.net/forum?id=Id4b5SY1Y8)
Supplement: supplementary_material [file attachment]

# Appendix for “PairwiseNet: Pairwise Collision Distance Learning for High-dof Robot Systems”

Anonymous Author(s)

Affiliation

Address

email

## 1 A Further Experimental Details

### 2 A.1 Capsule-based Bounding Volume Method for a Panda Robot Arm

3 We construct capsule-shaped collision primitives for a Panda robot arm as a baseline collision dis-  
4 tance estimation method (see Figure 1). Our approach follows a similar methodology to [1], which  
5 formulates an optimization problem as follows:

$$\min_{a_i, b_i, r_i} ||a_i - b_i||\pi r_i^2 + \frac{4}{3}\pi r_i^3 \quad (1)$$

$$\text{s.t. } \text{dist}(p, \overline{a_i b_i}) \leq r_i, \quad \text{for all } p \in \mathcal{M}_i \quad (2)$$

6 Here,  $i$  denotes the link index of the Panda robot arm,  $\mathcal{M}_i$  represents the vertices of the  $i^{\text{th}}$  link  
7 mesh, and  $a_i$ ,  $b_i$ , and  $r_i$  refer to the two endpoints and the radius of a capsule, respectively, and  $\overline{a_i b_i}$   
8 represents the line segment connecting the two endpoints. This formulation results in the creation  
9 of minimal volume capsules that encapsulate all vertices of the link meshes. The collision distance  
10 of the multi-arm robot systems can be estimated through the minimum distance calculation between  
11 capsules.

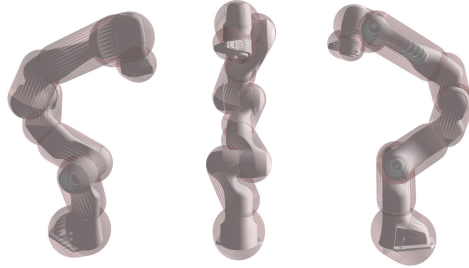

Figure 1: Illustrations of the Panda robot arm with capsule-shape collision primitives.

### 12 A.2 The Collision-free Guaranteed Threshold

13 The collision-free guaranteed threshold  $\epsilon_{\text{safe}}$  refers to a predefined distance value that is established  
14 in collision distance estimation methods. This threshold is set to ensure that during testing or actual  
15 operation, the estimated collision distance remains above this threshold for all valid configurations  
16 or movements of the robot system. In other words, if the estimated collision distance between the  
17 robot and any obstacles remains above the collision-free guaranteed threshold ( $\hat{d}_{\text{col}}(q) > \epsilon_{\text{safe}}$ ), it is  
18 considered safe and collision-free. In our experiments, we set the collision-free guaranteed threshold  
19 to the least conservative value that allows us to classify all collision configurations in the test dataset  
20 as collisions. These thresholds are then utilized for measuring the Safe-FPR.

Table 1: The Collision-free Guaranteed Thresholds

|              | Two arms | Three arms | Four arms |
|--------------|----------|------------|-----------|
| Capsule      | 0.0      | 0.0        | 0.0       |
| JointNN      | 0.2111   | 0.2015     | 0.2231    |
| PosNN        | 0.1141   | 0.1189     | 0.1756    |
| jointNERF    | 0.1661   | 0.1734     | 0.2001    |
| ClearanceNet | 0.2840   | 0.3713     | 0.4944    |
| DiffCo       | -1.2789  | -1.4672    | -0.9535   |
| PairwiseNet  | 0.0150   | 0.0152     | 0.0184    |

### 21 A.3 Hyperparameters

22 Table 2 shows hyperparameters employed in our experiments.

Table 2: Hyperparameters

| hyperparameter                                          | value              |
|---------------------------------------------------------|--------------------|
| batch size, learning rate, epoch for PairwiseNet        | 1000, 1e-3, 2000   |
| batch size, learning rate, epoch for ClearanceNet       | 191, 1.75e-4, 400  |
| batch size, learning rate, epoch for other NN baselines | 10000, 1e-3, 10000 |
| $k$ for $k$ -nearest neighbor of EdgeConv layers        | 5                  |
| # of points in the point cloud data of an shape element | 100                |
| hidden nodes of EdgeConv layers                         | 64                 |

## 23 B Additional Experimental Results

### 24 B.1 Inference Time of PairwiseNet

25 PairwiseNet has an efficient inference strategy that infers solely the regressor network without the  
 26 need to path through the encoder, which contains complex EdgeConv layers. Additionally, the batch  
 27 calculation capability of the neural network structure further enhances the efficiency of PairwiseNet  
 28 when estimating the global collision distance, even with a large number of element pairs in the  
 29 system. Table 3 provides the inference time of PairwiseNet for different environments. Notably,  
 30 even with an increase in the number of element pairs to 384 in a four-arm system, PairwiseNet  
 31 maintains a reasonably efficient inference time of 0.542 ms on CPU and 0.347 ms on GPU. These  
 32 inference times highlight the ability of PairwiseNet to deliver fast collision distance estimation,  
 33 ensuring practicality and real-time applicability in various robotic environments.

Table 3: Inference time of PairwiseNet

| Env.                      | Two arms | Three arms | Four arms | One arm with obstacles |
|---------------------------|----------|------------|-----------|------------------------|
| # of element pairs        | 64       | 192        | 384       | 145                    |
| Inference time (CPU) (ms) | 0.201    | 0.323      | 0.542     | 0.331                  |
| Inference time (GPU) (ms) | 0.235    | 0.284      | 0.347     | 0.257                  |

### 34 B.2 Collision-free Path Planning with PairwiseNet

35 The collision-free trajectory used in our experiments is the outcome of path planning process uti-  
 36 lizing the trained PairwiseNet model. Similar to the approaches presented in [2, 3], the trajectory

37 planning process can be formulated as the following optimization problem:

$$\min_{\tau} \int_0^T \dot{\tau}(t) dt \quad (3)$$

$$\text{s.t. } \hat{d}_{\text{col}}(\tau(t)) > \epsilon, \quad t \in [0, T] \quad (4)$$

$$\tau(0) = q_{\text{start}} \quad (5)$$

$$\tau(T) = q_{\text{end}}. \quad (6)$$

38 where  $\tau$  represents the trajectory in the joint configuration space,  $\tau(t) \in \mathbb{R}^{N_{\text{dof}}}$ , and  $q_{\text{start}}$  and  $q_{\text{end}}$  are  
 39 the start and end joint configurations, respectively, and  $\epsilon$  is the collision-free guaranteed threshold of  
 40 PairwiseNet. Auto-differentiation and the Adam optimizer in PyTorch [4] are employed for the op-  
 41 timization process. To enhance computational efficiency and trajectory smoothness, we utilize cubic  
 42 spline parameterization for the trajectory function  $\tau(t)$ . Additionally, the supplementary materials  
 43 include a video file showcasing another example of path planning with PairwiseNet.

## 44 References

- 45 [1] A. El Khoury, F. Lamiriaux, and M. Taix. Optimal motion planning for humanoid robots. In *2013*  
 46 *IEEE international conference on robotics and automation*, pages 3136–3141. IEEE, 2013.
- 47 [2] Y. Zhi, N. Das, and M. Yip. Diffco: Autodifferentiable proxy collision detection with multiclass  
 48 labels for safety-aware trajectory optimization. *IEEE Transactions on Robotics*, 2022.
- 49 [3] Y. Kim, J. Kim, and D. Park. Graphdistnet: A graph-based collision-distance estimator for  
 50 gradient-based trajectory optimization. *IEEE Robotics and Automation Letters*, 7(4):11118–  
 51 11125, 2022.
- 52 [4] A. Paszke, S. Gross, F. Massa, A. Lerer, J. Bradbury, G. Chanan, T. Killeen, Z. Lin,  
 53 N. Gimeshein, L. Antiga, A. Desmaison, A. Kopf, E. Yang, Z. DeVito, M. Raison, A. Tejani,  
 54 S. Chilamkurthy, B. Steiner, L. Fang, J. Bai, and S. Chintala. Pytorch: An imperative style, high-  
 55 performance deep learning library. In H. Wallach, H. Larochelle, A. Beygelzimer, F. d'Alché-  
 56 Buc, E. Fox, and R. Garnett, editors, *Advances in Neural Information Processing Systems 32*,  
 57 pages 8024–8035. Curran Associates, Inc., 2019. URL [http://papers.neurips.cc/paper/](http://papers.neurips.cc/paper/9015-pytorch-an-imperative-style-high-performance-deep-learning-library.pdf)  
 58 [9015-pytorch-an-imperative-style-high-performance-deep-learning-library.](http://papers.neurips.cc/paper/9015-pytorch-an-imperative-style-high-performance-deep-learning-library.pdf)  
 59 [pdf](http://papers.neurips.cc/paper/9015-pytorch-an-imperative-style-high-performance-deep-learning-library.pdf).
